# Supplementary material for: The potential role of hsa_circ_0005505 in the rupture of human intracranial aneurysm
Source: Research Square preprint supplement (doi:10.21203/rs.3.rs-210322/v1), 2021-02-23
Supplement: Supplementary file 1 [file fd252ffc649329a11df64fb8.docx]

qPCR primer sequences

| Primer name | Primer F (5'-3') | Primer R(5'-3') |
| --- | --- | --- |
| hsa_circ_0005505 | CATTCACTACCTGCACAACGTTC | GCTGCTTGAAAGTCTCTCTGCT |
| hsa_circ_0001947 | AAACCCAGTGCAGCCAGTTC | AGTGCATCACCTTTGTTTGTTTC |
| hsa_circ_0043001 | ACTCAGAAGCAGAACAGAGTGATG | GGAACTCTCTCTGGGGTGACAT |
| hsa_circ_0064557 | GGAGTGCCCCCTTTCACAG | GCCTCGTTCAAATGATCCATAC |
| hsa_circ_0058514 | GCACATTTCAACAGTCATGCAG | TTTCACCCTGTGTGGTGGATT |
